# Supplementary material
Source: publisher figshare collection journal article supplement (https://gsajournals.figshare.com/ndownloader/files/22933331)
Supplement: Supplementary file 1 [file 22933331]

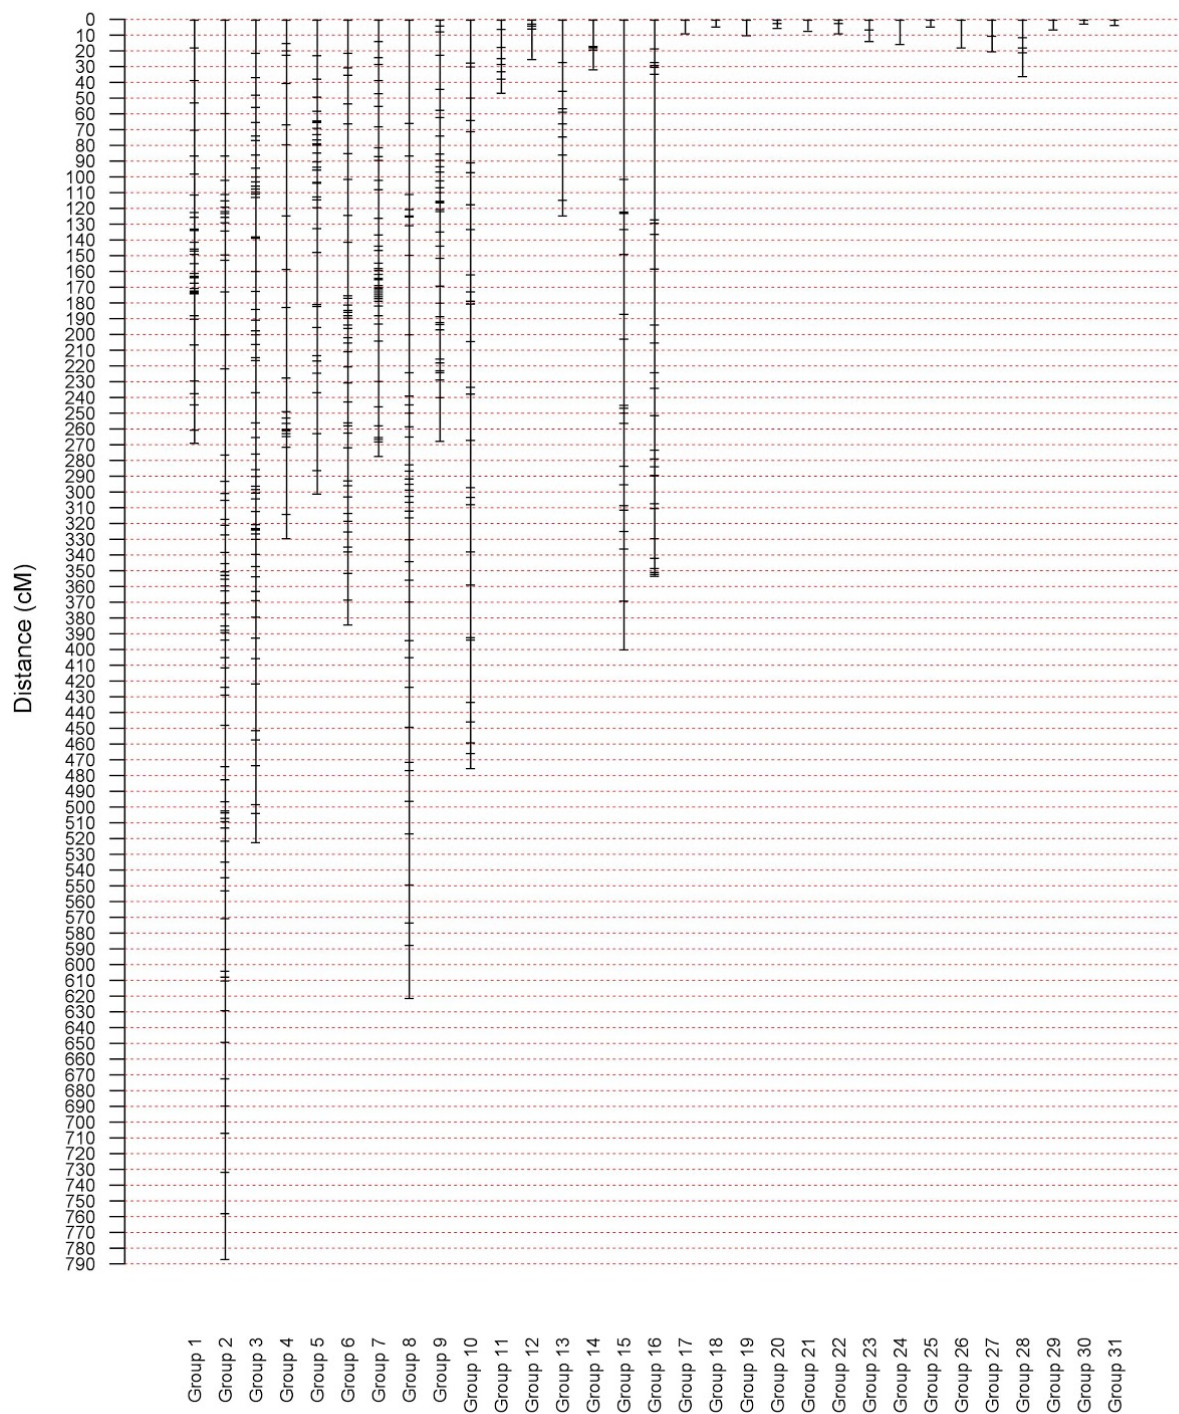

**Figure S1.** For taro (*Colocasia esculenta*), an initial Genetic Linkage map based on 558 SNP markers and 84 individuals of the '1025' mapping population (LOD = 5.97 and maximum recombination frequency = 0.3). Groups 17 and onwards showed a heavy reduction in the number of markers.
